# Supplementary material for: Brain-controlled modulation of spinal circuits improves recovery from spinal cord injury
Source: PubMed Central journal article supplement (PMC6070513; doi:10.1038/s41467-018-05282-6), 2018-08-01
Supplement: 41467_2018_5282_MOESM1_ESM.pdf [file 41467_2018_5282_MOESM1_ESM.pdf]

*Supplementary Information*

**BRAIN-CONTROLLED MODULATION OF  
SPINAL CIRCUITS IMPROVES RECOVERY  
FROM SPINAL CORD INJURY**

Bonizzato et al.

---

**a** Variance in step height explained by cortical activity at foot-off

| Animal ID | Correlation (r value) |
|-----------|-----------------------|
| A1        | 0.77                  |
| A2        | 0.83                  |
| B1        | 0.61                  |
| B2        | 0.67                  |
| D1        | 0.35                  |
| E1        | 0.84                  |
| F1        | 0.64                  |
| F2        | 0.79                  |

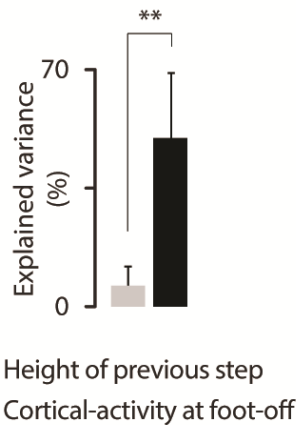

**b** Modulation of cortical ensemble population increases with the amount of spared tissue

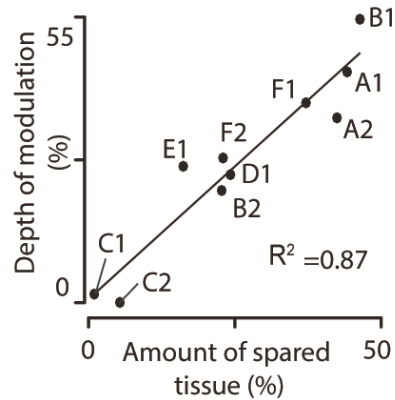

**Supplementary Fig. 1. Modulation of cortical ensemble population correlates with step height, but depends on the amount of spared tissue. (a)** For each rat, the correlation between the cortical activity at foot-off and the step height was calculated. The value of correlation coefficients is reported for each rat. The bar plot reports the mean variance of step height explained by the cortical activity at foot-off measured during the preceding step and for the ongoing step ( $n=8$ , mean  $\pm$  SD). \*\*,  $P < 0.01$ . **(b)** Correlation between the amount of spared tissue (%) and the extent of cortical population ensemble modulation during locomotion for all the experimental rats involved in the design of the brain-spine interface. The modulation is expressed in percent of increase of firing rate during locomotion compared to rest. The labels identifying each rat refer to **Supplementary Table 1**. Note that rats C1 and C2 were excluded from the study due to the absence of modulation in cortical ensemble population due to pronounced tissue damage (outside the targeted range of SCI severity).

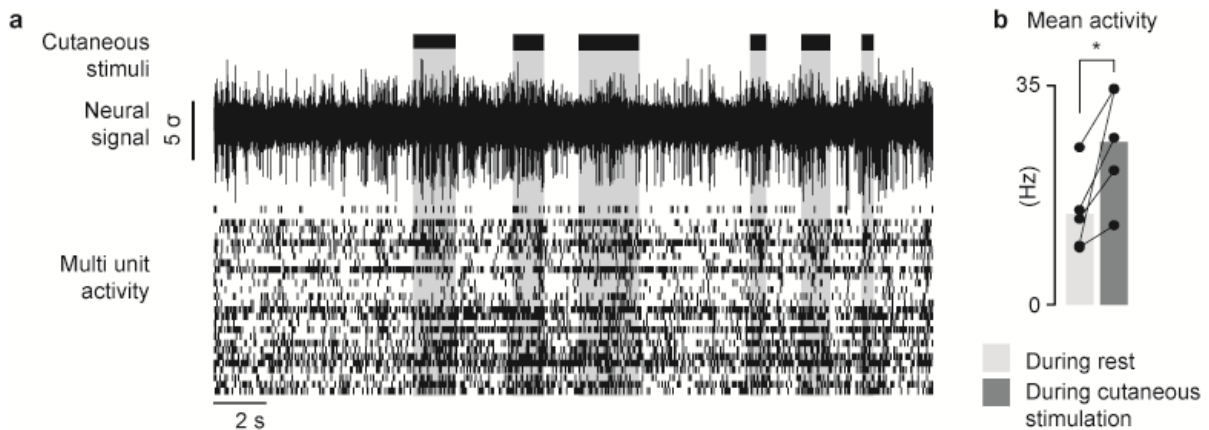

**Supplementary Fig. 2. Cortical activity evoked by sensory stimulation of the paw. (a)** Example of cortical activity (single channel and multi-unit activity) in response to successive applications of a pressure on the paw contralateral to the recordings. The horizontal bars and shaded region highlight the time windows over which the stimulation was applied. Recordings were performed at 3 weeks post-injury. **(b)** Bar plot reporting the mean activity measured over all the recorded multi-units during rest and over the period of cutaneous stimulation ( $n=5$ ). \*,  $P < 0.05$ .

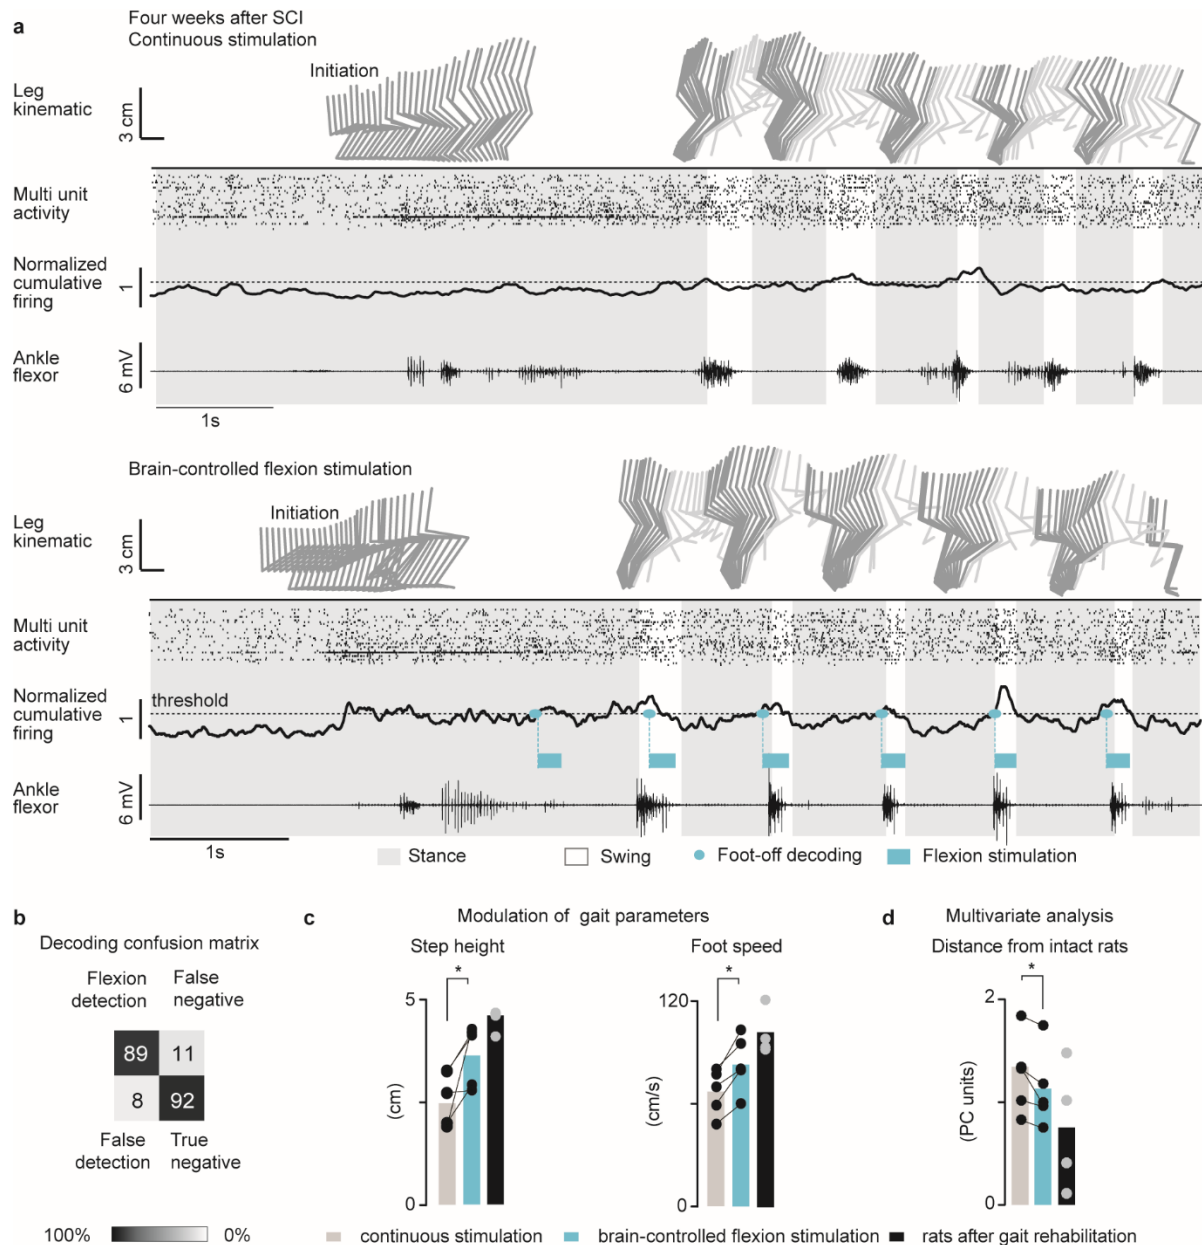

**Supplementary Fig. 3. Binary brain–spine interface alleviates locomotor deficits during overground locomotion.** (a) Recordings of bipedal locomotion along the runway at 3 weeks post–injury during continuous stimulation and with the binary brain–spine interface. Conventions are the same as in Fig. 2. (b) Confusion matrix of foot–off event decoding calculated across the 5 rats. (c) Bar plots reporting mean values and individual mean values of parameters modulated during continuous stimulation versus brain–controlled flexion stimulation. The values recorded in rats after gait rehabilitation are reported as a reference. (d) Bar plot reporting the distance from intact rats in the PC space calculated from 55 gait parameters, which thus quantifies locomotor performance. \*,  $P < 0.05$ .

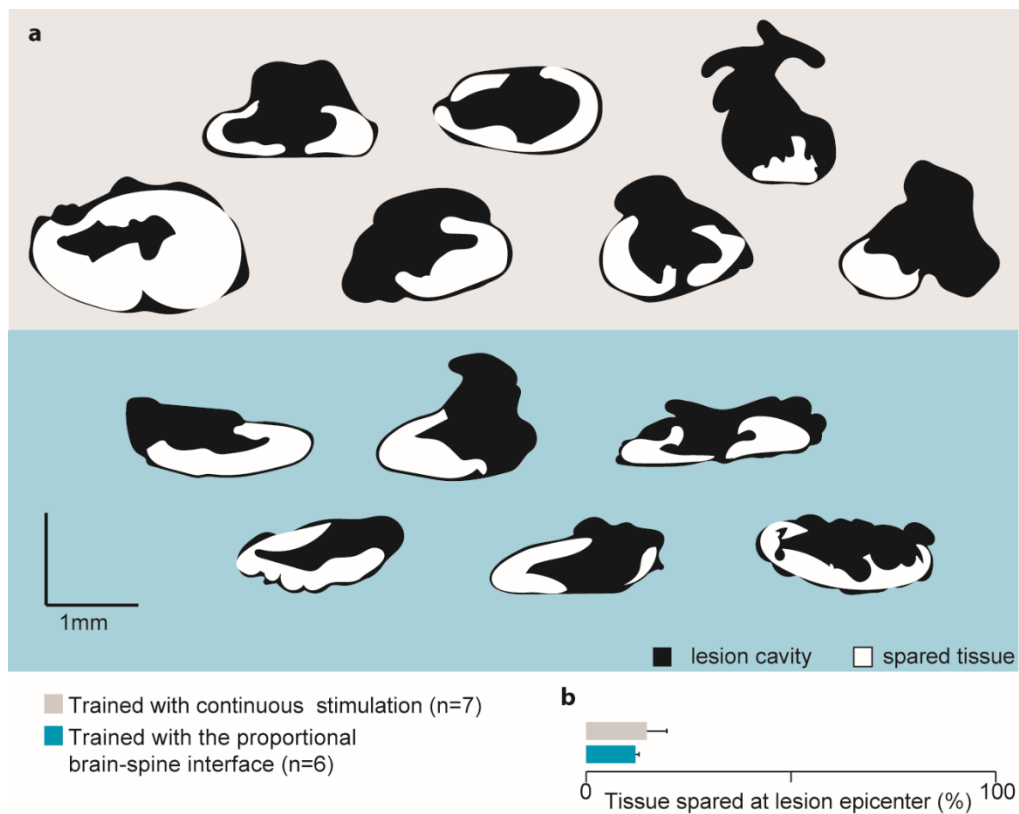

**Supplementary Fig. 4. Quantification of the amount of spared spinal cord tissue. (a)** Reconstruction of the lesion cavity (black) and spared tissue (white) at the epicentre of the contusion for both trained groups. **(b)** Bar plot reporting the amount of spared tissue for the two trained groups (mean  $\pm$  SEM).

| Animal ID | Binary BSI on treadmill Fig. 2 | Binary BSI overground Supp. Fig. 3 | Cortical modulation vs. spared tissue Supp. Fig. 1 | Proportional BSI early after SCI Fig. 6 | Rehabilitation enabled by proportional BSI Fig. 10 | Proportional BSI staircase/overground Fig. 8 | Cutaneous paw stimulation Supp. Fig. 2 |
|-----------|--------------------------------|------------------------------------|----------------------------------------------------|-----------------------------------------|----------------------------------------------------|----------------------------------------------|----------------------------------------|
| A1        | ✓                              |                                    | ✓                                                  |                                         |                                                    |                                              | ✓                                      |
| A2        | ✓                              |                                    | ✓                                                  |                                         |                                                    |                                              | ✓                                      |
| B1        |                                | ✓                                  | ✓                                                  |                                         |                                                    |                                              |                                        |
| B2        |                                | ✓                                  | ✓                                                  |                                         |                                                    |                                              |                                        |
| C1        |                                |                                    | ✓                                                  |                                         |                                                    |                                              |                                        |
| C2        |                                |                                    | ✓                                                  |                                         |                                                    |                                              |                                        |
| D1        |                                |                                    | ✓                                                  |                                         |                                                    |                                              |                                        |
| E1        | ✓                              | ✓                                  | ✓                                                  |                                         |                                                    |                                              |                                        |
| F1        | ✓                              | ✓                                  | ✓                                                  | ✓                                       |                                                    |                                              |                                        |
| F2        | ✓                              | ✓                                  | ✓                                                  | ✓                                       |                                                    |                                              |                                        |
| G1        |                                |                                    |                                                    | ✓                                       |                                                    |                                              |                                        |
| G2        |                                |                                    |                                                    | ✓                                       |                                                    |                                              |                                        |
| G3        |                                |                                    |                                                    | ✓                                       |                                                    |                                              |                                        |
| H1        |                                |                                    |                                                    |                                         | ✓                                                  |                                              |                                        |
| H2        |                                |                                    |                                                    |                                         | ✓                                                  |                                              |                                        |
| H3        |                                |                                    |                                                    |                                         | ✓                                                  |                                              |                                        |
| H4        |                                |                                    |                                                    |                                         | ✓                                                  |                                              |                                        |
| H5        |                                |                                    |                                                    |                                         | ✓                                                  |                                              |                                        |
| H6        |                                |                                    |                                                    |                                         | ✓                                                  |                                              |                                        |
| H7        |                                |                                    |                                                    |                                         | ✓                                                  |                                              |                                        |
| I1        |                                |                                    |                                                    |                                         | ✓                                                  |                                              |                                        |
| I2        |                                |                                    |                                                    |                                         | ✓                                                  | ✓                                            |                                        |
| I3        |                                |                                    |                                                    |                                         | ✓                                                  | ✓                                            |                                        |
| I4        |                                |                                    |                                                    |                                         | ✓                                                  | ✓                                            |                                        |
| I5        |                                |                                    |                                                    |                                         | ✓                                                  | ✓                                            |                                        |
| I6        |                                |                                    |                                                    |                                         | ✓                                                  | ✓                                            |                                        |
| J1        |                                |                                    |                                                    |                                         |                                                    |                                              | ✓                                      |
| J2        |                                |                                    |                                                    |                                         |                                                    |                                              | ✓                                      |
| J3        |                                |                                    |                                                    |                                         |                                                    |                                              | ✓                                      |

**Supplementary Table 1. List of experimental procedures conducted per group of rats that participated to the experiments.**

|                                           |                                                           |
|-------------------------------------------|-----------------------------------------------------------|
| Temporal features of gait                 | 26 Whole limb speed depth                                 |
| 1 Duration of gait cycle                  | 27 Crest elevation depth                                  |
| 2 Speed of animal during stride           | 28 Thigh elevation depth                                  |
| 3 Stance duration                         | 29 Leg elevation depth                                    |
| 4 Swing duration                          | 30 Foot elevation depth                                   |
| 5 Drag duration                           |                                                           |
|                                           | Limb coordination                                         |
| Limb endpoint trajectory                  | 31 Temporal coupling between crest and thigh              |
| 6 Step height                             | 32 Temporal coupling between thigh and leg                |
| 7 Ankle clearance                         | 33 Temporal coupling between leg and foot                 |
| 8 Maximal foot speed during swing         | 34 Correlation between crest and thigh oscillations       |
| 9 Foot acceleration at swing onset        | 35 Correlation between crest and leg oscillations         |
| 10 Foot speed at swing onset              | 36 Correlation between crest and foot oscillations        |
| 11 Foot lateral displacement during swing | 37 Correlation between thigh and leg oscillations         |
|                                           | 38 Correlation between thigh and foot oscillations        |
| Stability                                 | 39 Correlation between leg and foot oscillations          |
| 12 Stance width                           | 40 Relative duration between crest and thigh angle minima |
| 13 Maximum hip vertical position          | 41 Relative duration between crest and leg angle minima   |
| 14 Minimum hip vertical position          | 42 Relative duration between crest and foot angle minima  |
| 15 Hip oscillation amplitude              | 43 Relative duration between thigh and leg angle minima   |
| 16 Pelvic center of mass vertical motion  | 44 Relative duration between thigh and foot angle minima  |
|                                           | 45 Relative duration between leg and foot angle minima    |
| Joint angles                              | 46 Phase of Crest maximal contraction                     |
| 17 Hip joint excursion                    | 47 Phase of Hip maximal contraction                       |
| 18 Knee joint excursion                   | 48 Phase of Knee maximal contraction                      |
| 19 Ankle joint excursion                  | 49 Phase of Ankle maximal contraction                     |
| 20 Hip joint speed depth                  | 50 Phase of Foot maximal contraction                      |
| 21 Knee joint speed depth                 | 51 Lag between crest and thigh maxima                     |
| 22 Ankle joint speed depth                | 52 Lag between thigh and leg maxima                       |
| 23 Foot lateral oscillation               | 53 Lag between leg and foot maxima                        |
|                                           |                                                           |
| Segmental oscillations                    | Robotic assistance required                               |
| 24 Whole-limb excursion amplitude         | 54 Percentage of body weight supported                    |
| 25 Whole-limb lateral excursion amplitude | 55 Robot vertical force                                   |

**Supplementary Table 2. Analysis of kinematic activity: parameters computed for quantification.**
